# Supplementary material
Source: publisher figshare collection journal article supplement (https://frontiersin.figshare.com/ndownloader/files/22827959)
Supplement: Supplementary file 1 [file 22827959]

Supplementary Material


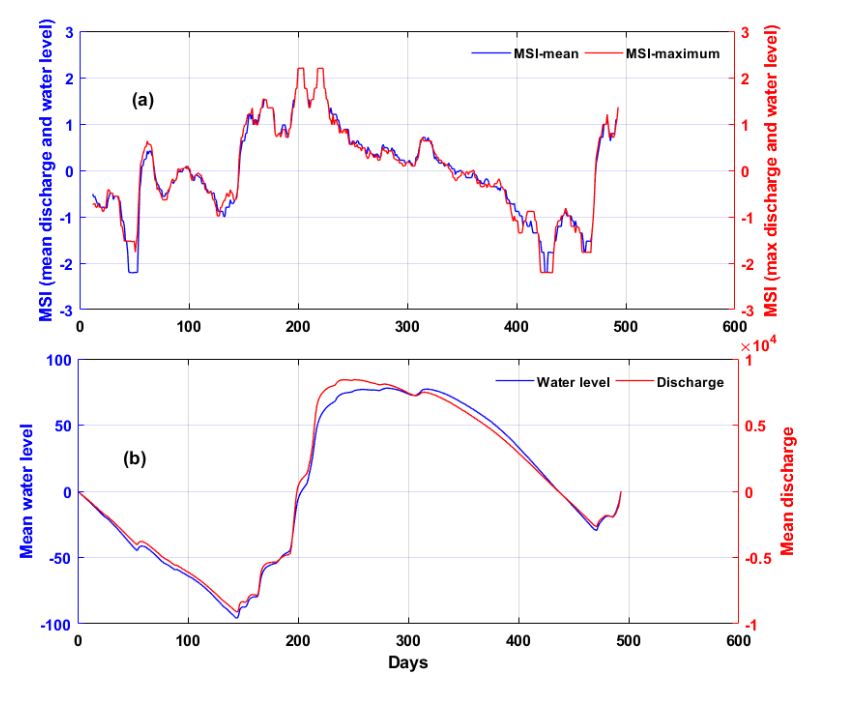


**Supplementary Figure 1.** Hydrological characteristics of a flooding event on 28th of March, 2018 in the Tully-Murray Rivers, Australia


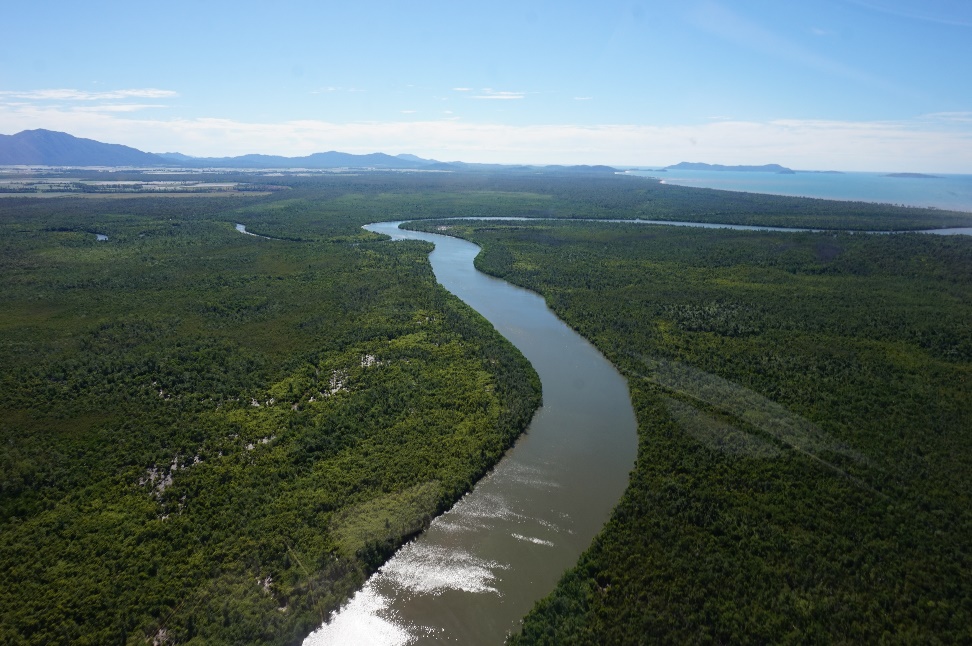


**Supplementary Figure 2.** Aerial view of coastal wetlands within the lower Murray River, within the catchments of the Great Barrier Reef, Australia.


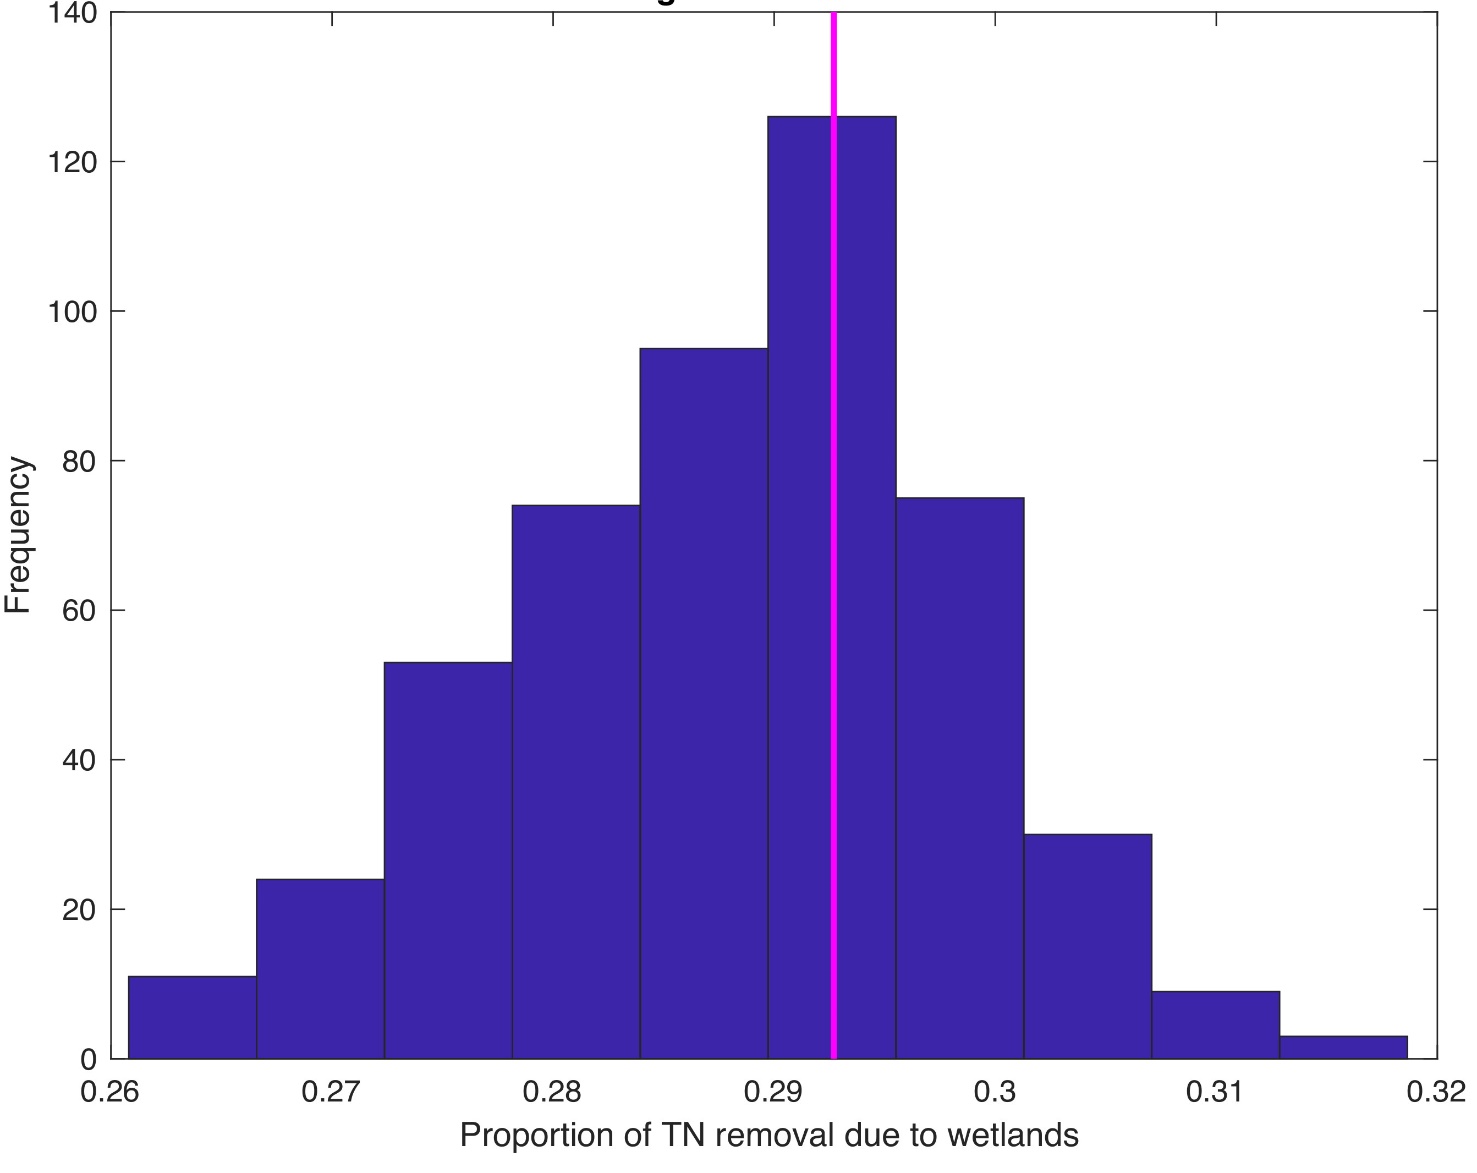


**Supplementary Figure 3.** Frequency of the proportion of TN removal due to wetlands in sub-catchment of the Tully-Murray River (SC187) after 500 replicates from a Monte Carlo Simulation. The parameters (rates, half-saturation values, and settling rates) were randomly sampled from distributions within ± 20% of the parameters selected for the model (See Table 1).

**
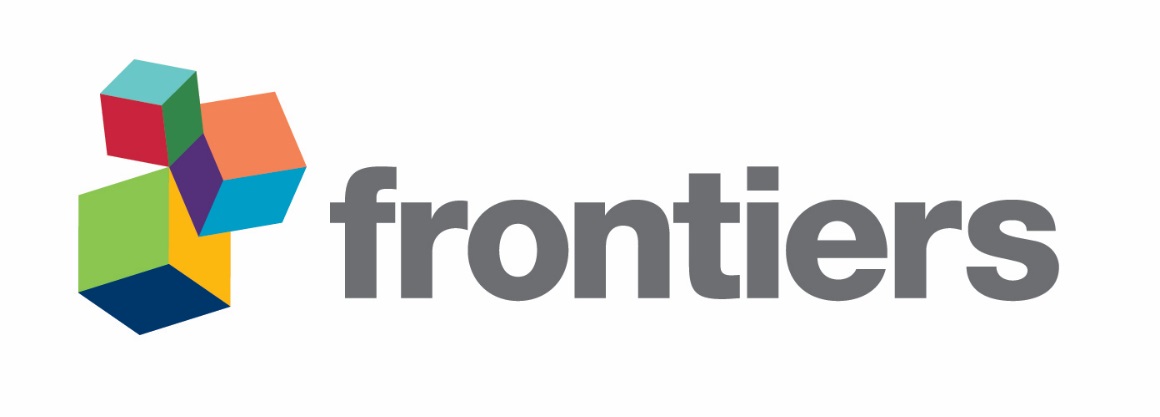
**
